# Supplementary material for: Efficient reactive blue 19 decolorization by the comparison of ozonation membrane contacting process and Fenton oxidation
Source: Royal Society of Chemistry journal article supplement (doi:10.1039/d1ra01871j), 2021-01-01
Supplement: d1ra01871j1.pdf [file d1ra01871j1.pdf]

1 **Supplementary Material**

2 **Table S1** Ozone utilization with different gas and liquid velocities

| <b>Gas velocity</b>                        |                                                  |                                                            |
|--------------------------------------------|--------------------------------------------------|------------------------------------------------------------|
| <b>Gas velocity<br/>(m s<sup>-1</sup>)</b> | <b>Ozone utilization<br/>(mg L<sup>-1</sup>)</b> | <b>Flux of ozone<br/>(mg m<sup>-2</sup>s<sup>-1</sup>)</b> |
| 0.13                                       | 10                                               | 1.33                                                       |
| 0.27                                       | 10                                               | 2.66                                                       |
| 0.40                                       | 8                                                | 3.19                                                       |
| 0.53                                       | 7                                                | 3.72                                                       |

  

| <b>Liquid velocity</b>                            |                                                  |                                                            |
|---------------------------------------------------|--------------------------------------------------|------------------------------------------------------------|
| <b>Liquid flow rate<br/>(mL min<sup>-1</sup>)</b> | <b>Ozone utilization<br/>(mg L<sup>-1</sup>)</b> | <b>Flux of ozone<br/>(mg m<sup>-2</sup>s<sup>-1</sup>)</b> |
| 200                                               | 11                                               | 1.95                                                       |
| 300                                               | 12                                               | 3.19                                                       |
| 400                                               | 13                                               | 4.61                                                       |
| 500                                               | 13                                               | 5.76                                                       |

3

4

5

6

7

8

9

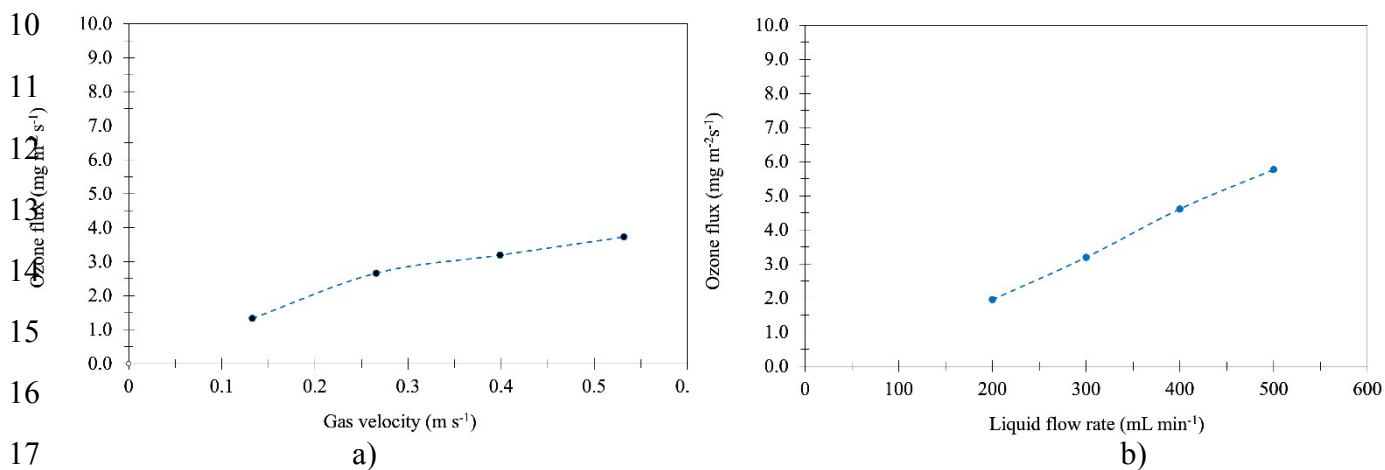

18 **Figure S1.** Effect of affecting parameters on ozone flux using 0.075 mM of RB 19: a) gas  
 19 velocity and b) liquid velocity.

20

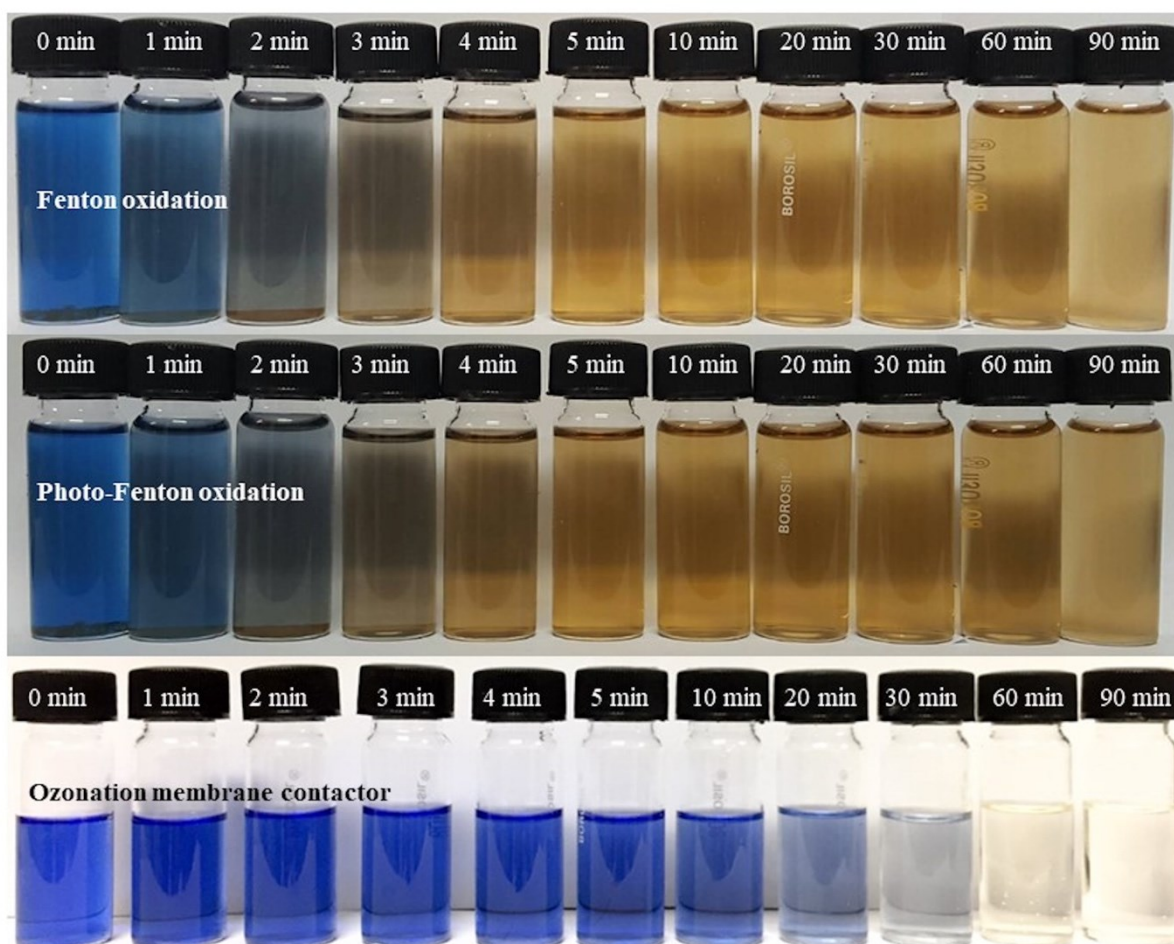

21

22 **Figure S2.** Illustration of RB 19 after treatment by Fenton oxidation, photo-Fenton oxidation  
 23 and ozonation membrane contactor using PVDF-PAM membrane at different times.

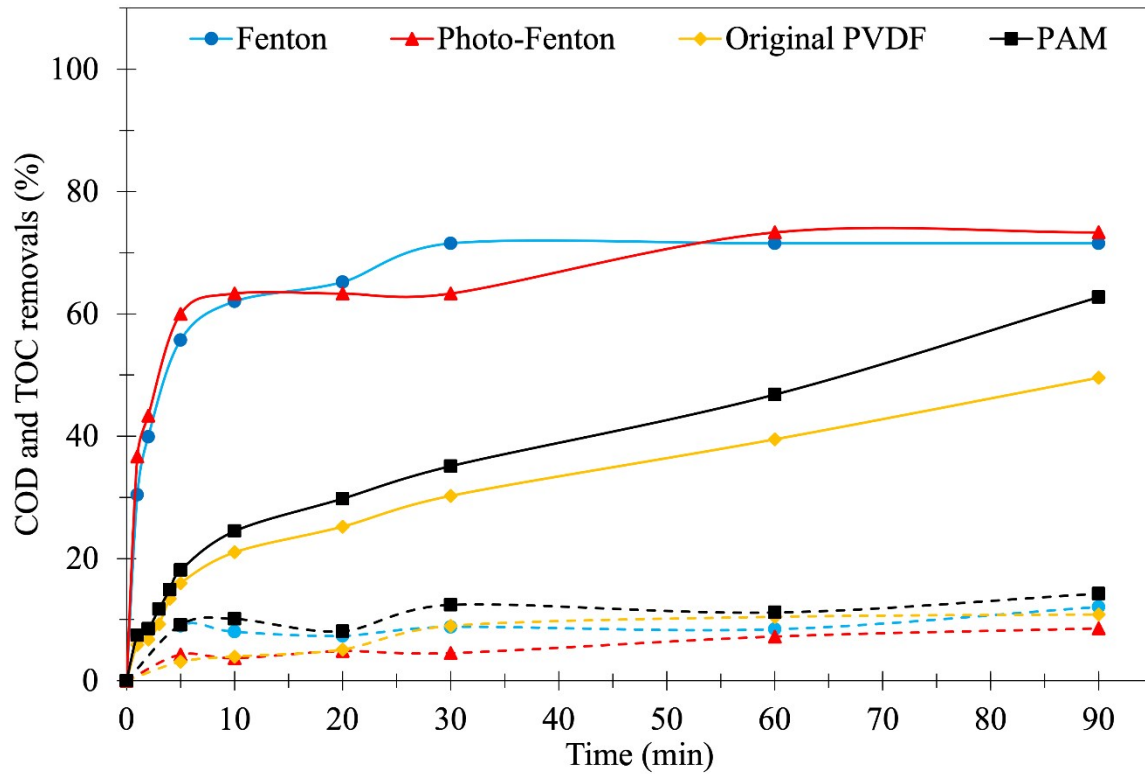

25

26 **Figure S3.** The variation of COD TOC and BOD<sub>5</sub>/COD after 90 min of RB 19 decolorization  
 27 by Fenton oxidations and ozonation membrane contactor with different membranes

28

(solid lines = COD removal and dashed lines = TOC removal)

29

30
